# Supplementary material
Source: PubMed Central journal article supplement (PMC2751535)

Z-section scanning, step size= 1 $\mu$ m

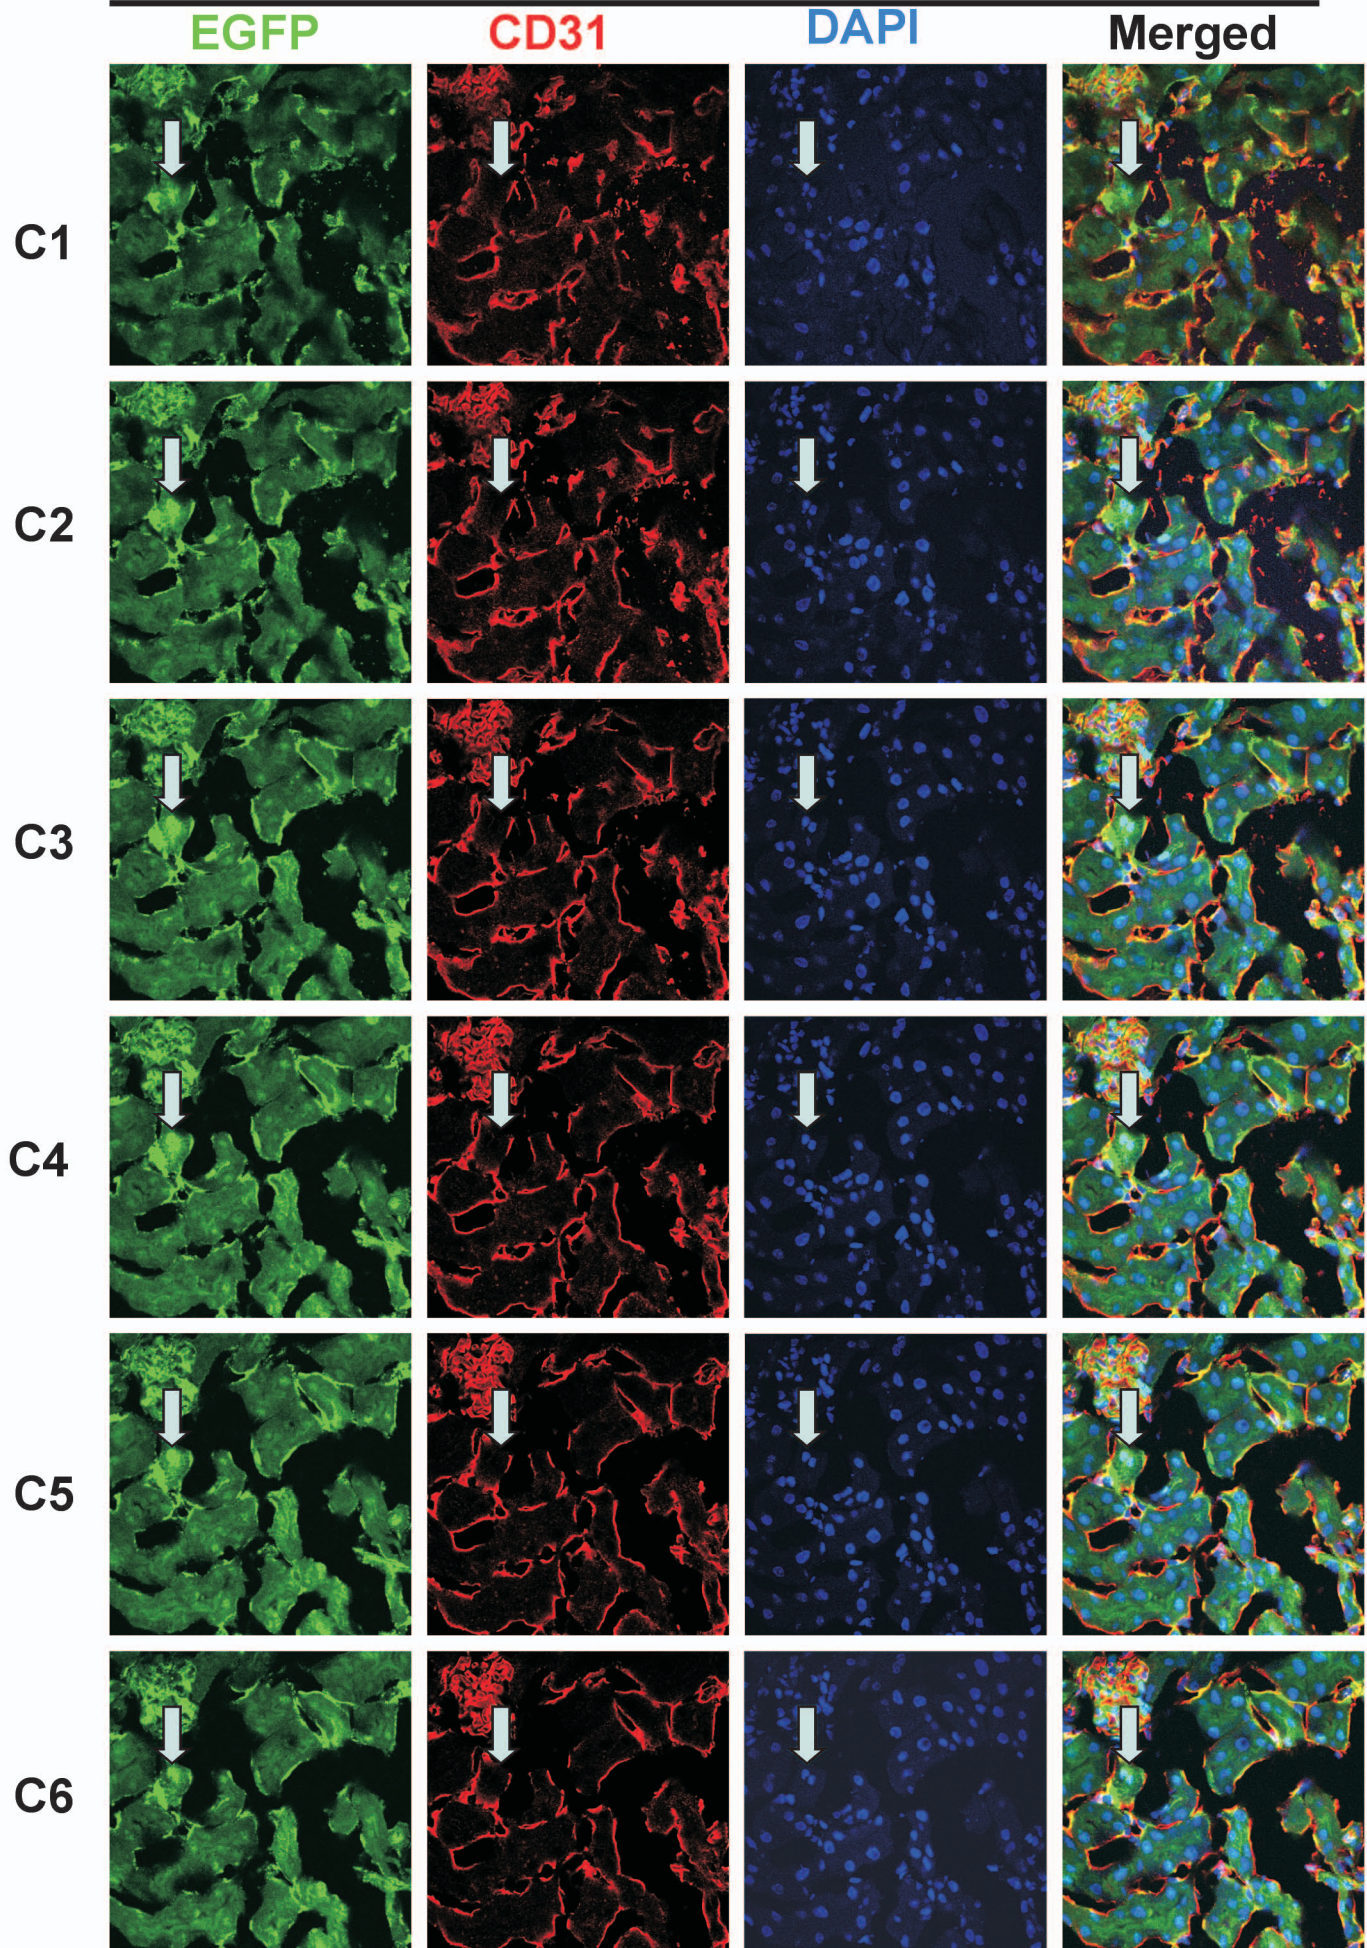

Supplement: ajpath.2009.090096_1.pdf [file ajpath.2009.090096_1.pdf]

**(A)  $\alpha$ -SMA**

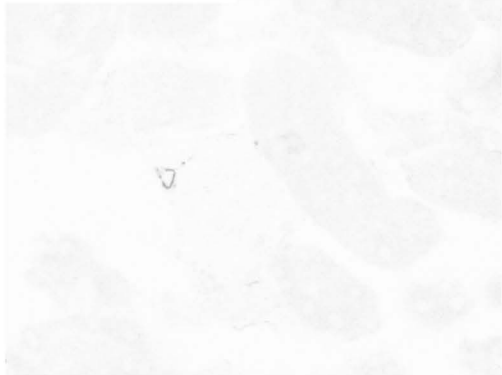

**(B)  $\alpha$ -SMA**

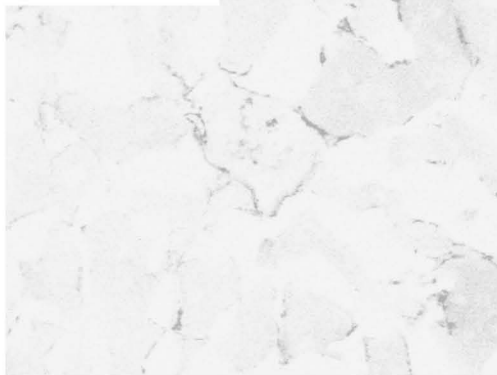

**(C)  $\alpha$ -SMA**

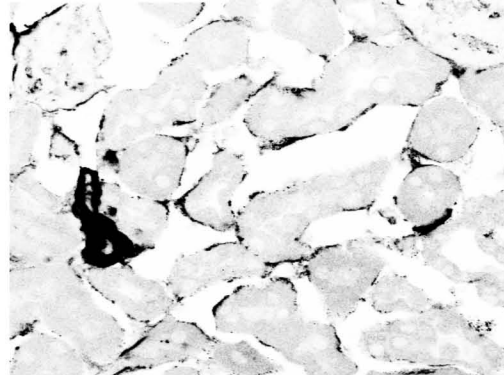

**(D) Collagen IV**

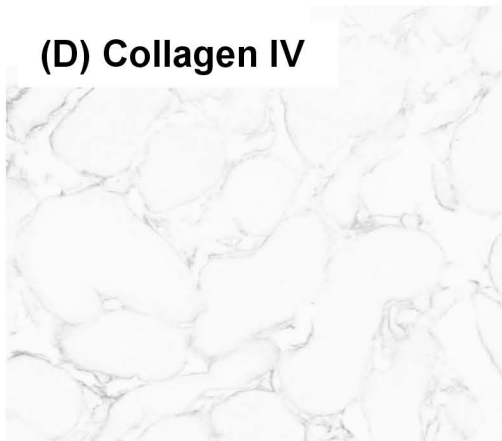

**(E) Collagen IV**

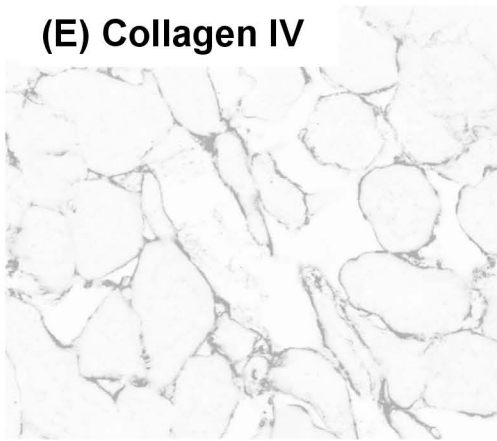

**(F) Collagen IV**

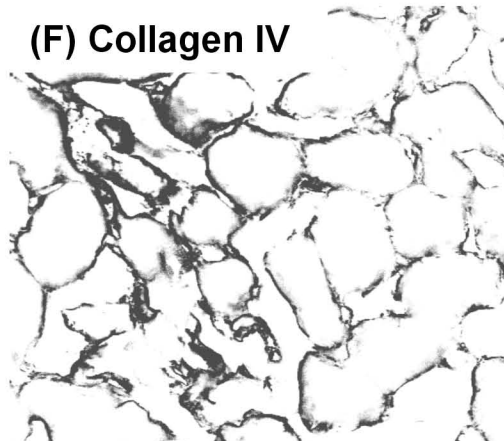

Supplement: ajpath.2009.090096_2.pdf [file ajpath.2009.090096_2.pdf]

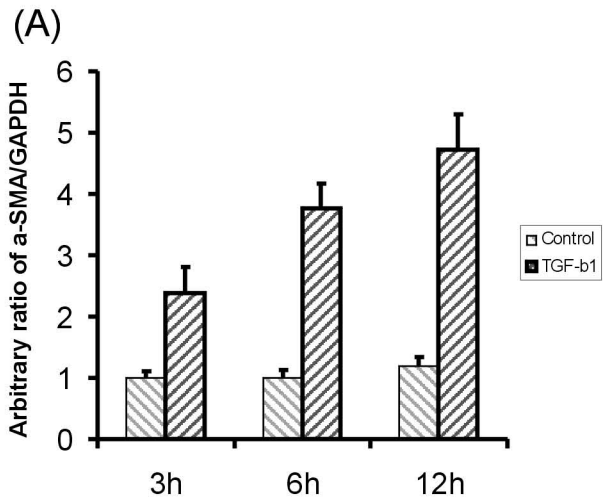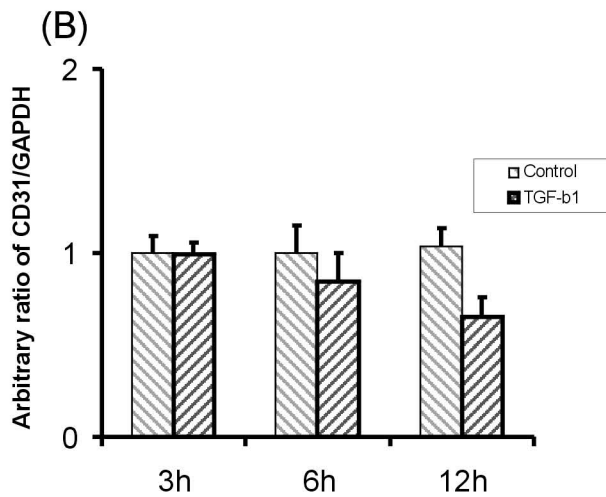

Supplement: ajpath.2009.090096_3.pdf [file ajpath.2009.090096_3.pdf]

**(A)**

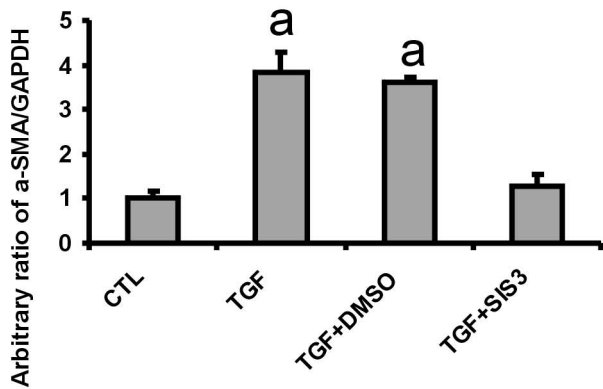

**(B)**

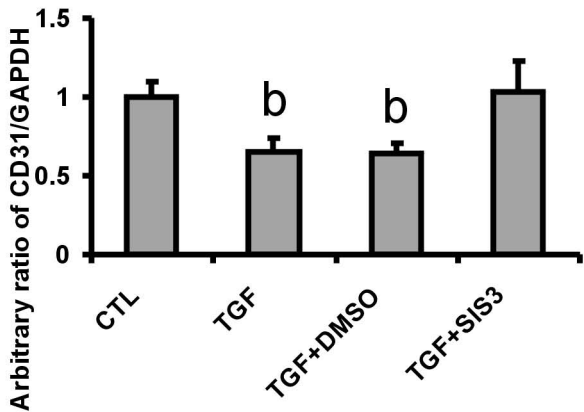

Supplement: ajpath.2009.090096_4.pdf [file ajpath.2009.090096_4.pdf]
